# Supplementary material
Source: Springer Nature journal article supplement (https://www.springermedizin.de/resource/supplementary/12894_2011_187_MOESM8_ESM.pdf/9513146)

Growth factor receptors

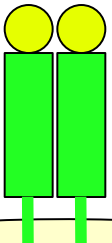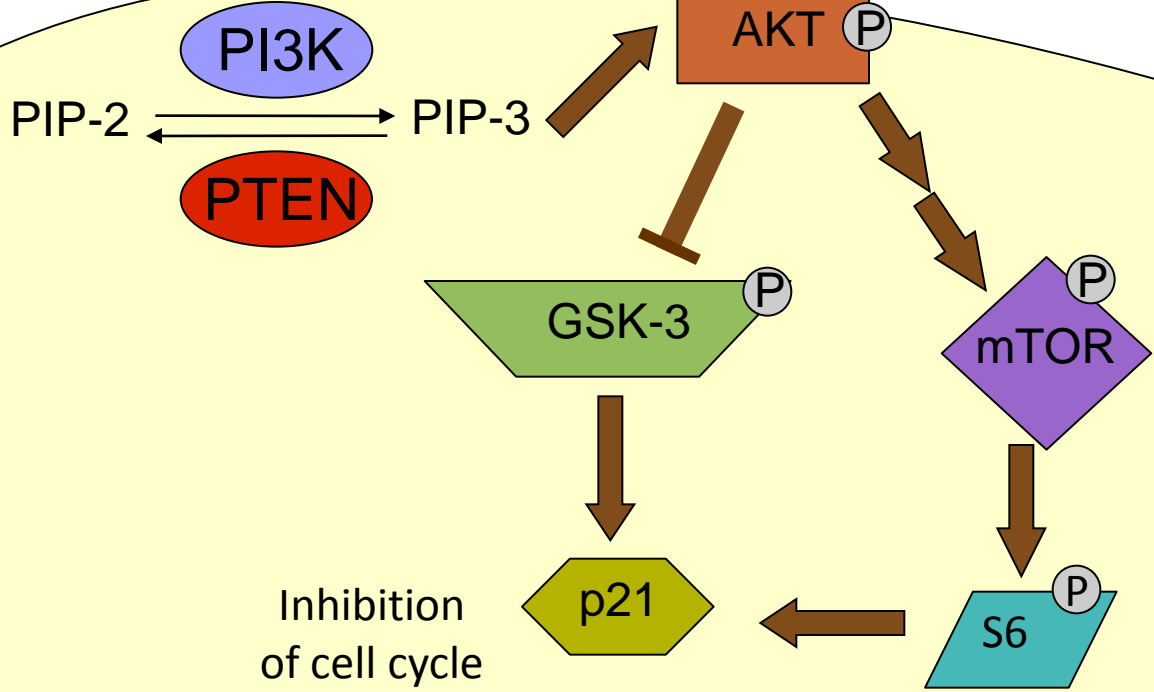

Inhibition of cell cycle

Supplement: MOESM8 [file 9513146]
